# Supplementary material for: A Multistage Genetic Association Study Identifies Breast Cancer Risk Loci at 10q25 and 16q24
Source: Oxford University Press journal article supplement (doi:10.1158/1055-9965.epi-12-0386), 2012-09-01
Supplement: 10559965epi120386-sup-epi-12-0386tab1.xlsx [file 10559965epi120386-sup-epi-12-0386tab1.xlsx]

## Sheet: Sheet1
	Supplemental Table 1. Number of risk allele carriers.
				an
				Case			Control
	SNP	Locus	Variant	0	1	2	0	1	2	Study
	rs1626678	10q25.3	G	118	306	182	279	606	308	NBC
				260	530	351	280	589	271	CGEMS
				292	709	398	278	515	283	CBCS
				272	531	311	279	584	304	BioVU
	rs8046508	16q23.1	T	402	149	21	855	254	22	NBC
				787	324	30	842	277	21	CGEMS
				990	351	36	781	249	15	CBCS
				822	272	19	880	272	15	BioVU
	rs13387042	2q35	A	129	294	178	237	633	320	NBC
				233	552	355	275	569	296	CGEMS
				264	662	442	221	543	272	CBCS
				244	557	313	261	597	308	BioVU
	rs4973768	3p24.1	T	168	284	151	347	577	271	NBC
				276	582	281	311	565	263	CGEMS
				351	696	357	282	563	240	CBCS
				271	568	274	321	572	274	BioVU
	rs16886165	5q11.2	G	402	181	22	829	337	28	NBC
				772	331	41	826	284	32	CGEMS
				974	399	28	769	280	30	CBCS
				754	326	34	817	318	32	BioVU
	rs10941679	5p12	G	297	256	51	650	454	89	NBC
				615	440	90	672	420	50	CGEMS
				692	605	103	592	432	55	CBCS
				608	429	76	613	478	76	BioVU
	rs1562430	8q24.21	A	120	294	191	218	580	397	NBC
				189	519	436	207	566	366	CGEMS
				230	662	504	182	537	364	CBCS
				172	515	425	194	575	393	BioVU
	rs1219648	10q26.13	G	196	295	113	457	571	163	NBC
				349	543	249	433	538	170	CGEMS
				459	779	275	414	581	163	CBCS
				342	561	206	420	548	197	BioVU
	rs999737	14q24.1	C	32	231	339	64	436	690	NBC
				47	391	703	76	406	656	CGEMS
				66	504	841	58	405	620	CBCS
				68	361	683	65	410	690	BioVU
	rs1543506	9q22.33	T	254	286	63	542	483	171	NBC
				457	562	126	504	482	156	CGEMS
				600	654	145	504	437	132	CBCS
				534	450	128	506	528	133	BioVU
	rs7861186	9q22.33	C	75	296	234	198	512	487	NBC
				155	576	414	190	497	455	CGEMS
				196	689	529	165	476	446	CBCS
				151	479	482	164	563	440	BioVU
	rs10819308	9q22.33	G	74	292	232	197	513	481	NBC
				155	575	415	191	495	456	CGEMS
				194	684	532	163	475	446	CBCS
				151	479	483	164	563	440	BioVU
	aNumber of risk allele carriers among cases and controls (0, subjects without the risk allele; 1, subjects heterozygous for the risk allele; 2, subjects homozygous for the risk allele).
